# Supplementary material for: Ciclopirox Olamine Induces Proliferation Inhibition and Protective Autophagy in Hepatocellular Carcinoma
Source: MDPI journal article supplement (doi:10.3390/ph16010113), 2023-01-12
Supplement: s1 [file s1]

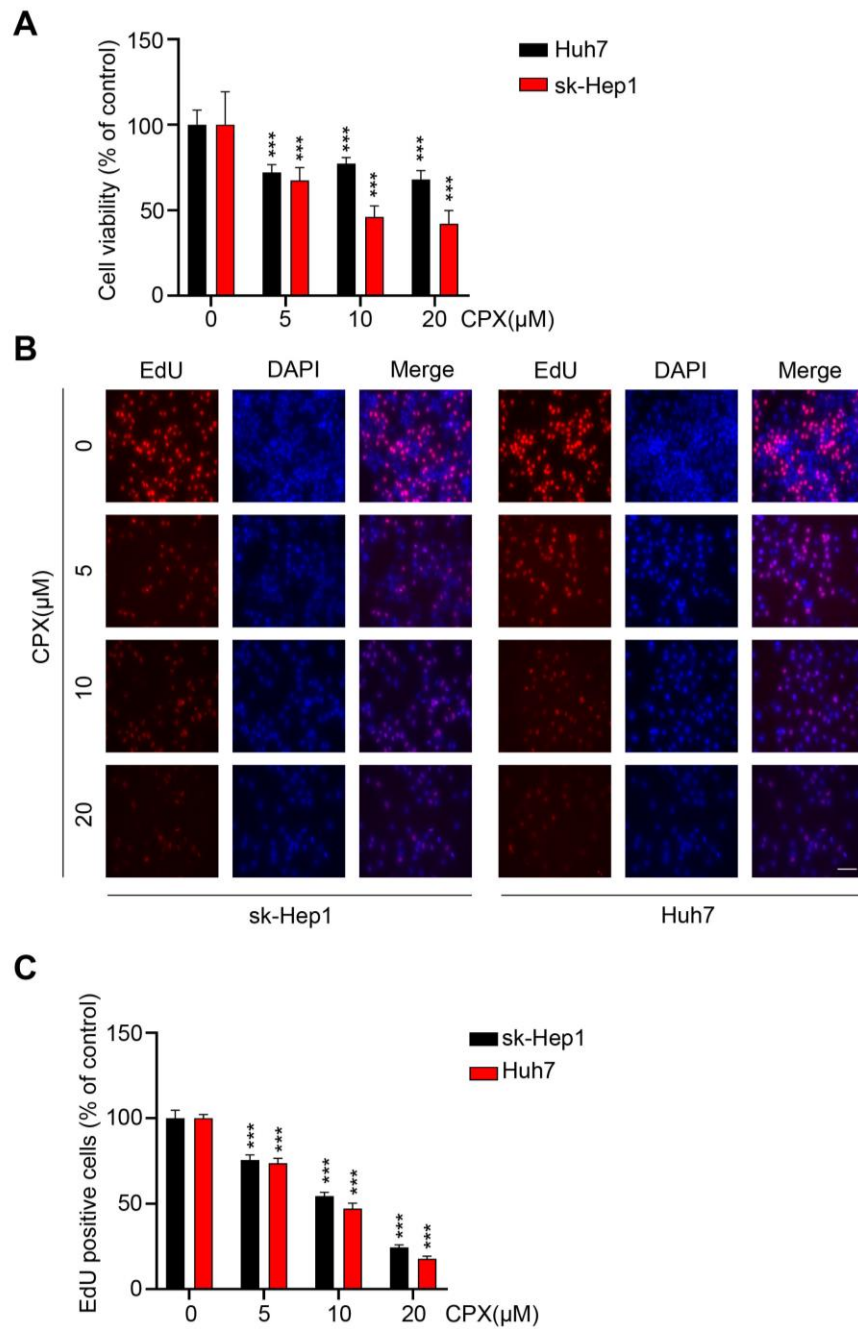

**Figure S1.** CPX inhibits proliferation in HCC cells. (A) The cell viability was detected by CCK8 kit. sk-Hep1 and Huh7 cells were treated with indicated concentrations of CPX for 48 h. (B,C) EdU assay of HCC cells treated with indicated concentrations of CPX for 48 h. The EdU positive cell rate was quantitated. Scale bar, 100 μm. Data are means  $\pm$  s.d. and are representative of 3 independent experiments. \*\*\*,  $p < 0.001$ . Statistical significance compared with respective control groups.

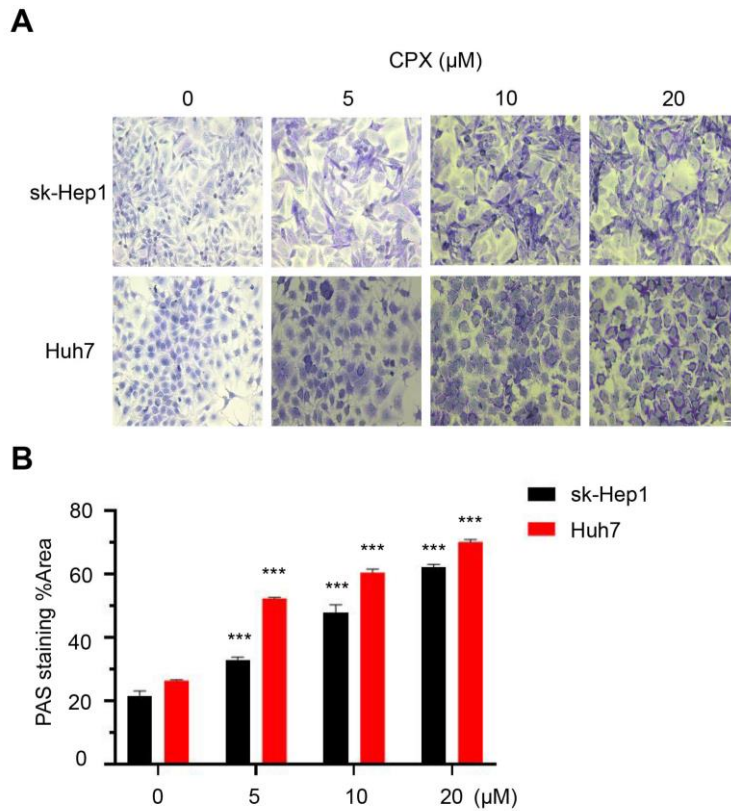

**Figure S2.** Glycogen clustering are induced by CPX in HCC cells. **(A)** PAS staining in sk-Hep1 and Huh7 cells treated with indicated concentrations of CPX for 24 h. **(B)** The PAS staining intensities of the images were quantified using Image J software. Scale bar, 50  $\mu$ m. Data are means  $\pm$  s.d. and are representative of 3 independent experiments. \*\*\*,  $p < 0.001$ . Statistical significance compared with respective control groups.
